# Supplementary material for: Self-assembly of aluminium–salen coupled nanostructures from encoded modules with cleavable disulfide DNA-linkers
Source: Royal Society of Chemistry journal article supplement (doi:10.1039/b403956d), 2004-01-01
Supplement: b403956d.doc [file b403956d.doc]

**Self-assembly of aluminium-salen coupled nanostructures from encoded modules with cleavable disulfide DNA-linkers**

**Raymond S. Brown, Morten Nielsen, Kurt V. Gothelf***

Removal of the acetal protecting groups of the LOSMaldehyde functionalities and the coupling of LOMs with Mn(OAc)2 and ethylenediamine were performed according to a previously published procedure from our laboratories.S1

**Coupling with Al3+ and disulphide reduction***.* 10 µl of 5 µM LOM or LOSM modules in 500 mM KCl, 10 mM TAPS (pH 8.4) were heated in a thermocycler at 55°C for 5 min and cooled slowly to 5°C (at 5°C per min). The coupling reaction was performed by addition of 1.0 mM (EDA), 0.25 mM Al(NO3)3 and incubation for 3 h at 35°C.

Disulphide reduction was performed by addition of 0.2 µl of 50 mM TCEP (pH 7.0) for 1 h at rt. Analysis of the reaction products was by electrophoresis at 50 V in 7.5% polyacrylamide gels (30:1.6 acrylamide:bisacrylamide) in 50 mM TAPS (pH 8.4) with (see article Fig. 2C) and without 8 M urea (Fig. S1). Samples were loaded in 15% (v/v) glycerol or 7.5 M urea without heating or addition of dyes.

The native gel shows that there are only single LOM and LOSM dimer products from the coupling reaction (Fig. S1, lanes 4, 5 and 8). A 15 base pair duplex was obtained after cleavage of the disulfide bridges in Dimer-**3** (Fig. S1, lane 9) which, fluoresces stronger with ethidium bromide/UV light, and runs slightly slower during electrophoresis than the 15 nt single stranded oligomers obtained by cleavage of the disulfide bridges in LOSM**-1** (Fig. S1, lane 7).


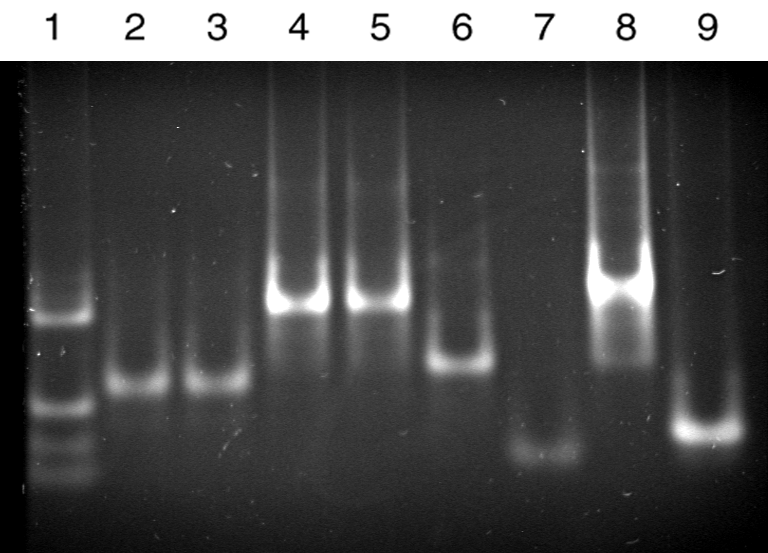


**Figure S1.** Nondenaturing polyacrylamide gel showing the dimer product and selective release of DNA by reduction with TCEP. Gels were fixed in 50% (v/v) ethanol, stained with ethidium bromide and photographed in UV light. DNA markers are shown in lane 1; 65, 31, 21, 11 nt. Lane 2, LOM**-4**; lane 3,LOM**-5** with TCEP; lane 4, LOM**-4** and LOM**-5** dimer ; lane 5, LOM**-4** and LOM**-5** dimer with TCEP. In lane 6, LOSM**-1**; lane 7,LOSM**-1** reduced by TCEP to give 15-nt oligonucleotides; lane 8, LOSM**-1** and LOSM**-2** dimer; Lane 9,LOSM**-1** andLOSM**-2** dimer reduced by TCEP to a 15-bp duplex and 15-nt oligonucleotides.

**MALDI-TOF Characterization.** LOSM**-1** andLOSM**-2** were analyzed by MALDI-TOF (Applied Biosystems, DNA-Technology) before the deprotection of the aldehyde groups using a 3-hydroxypicolinic acid matrix (Fig. S2).

**A** **B**


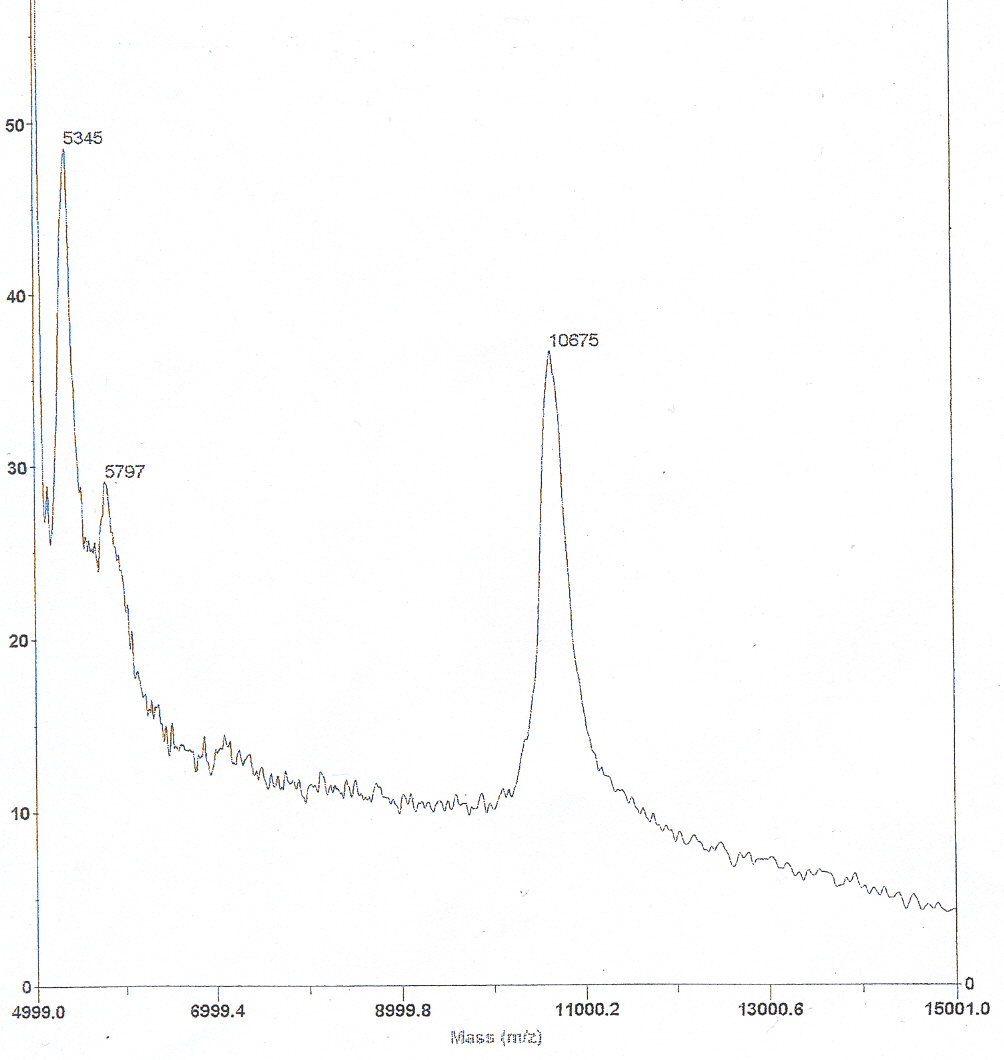

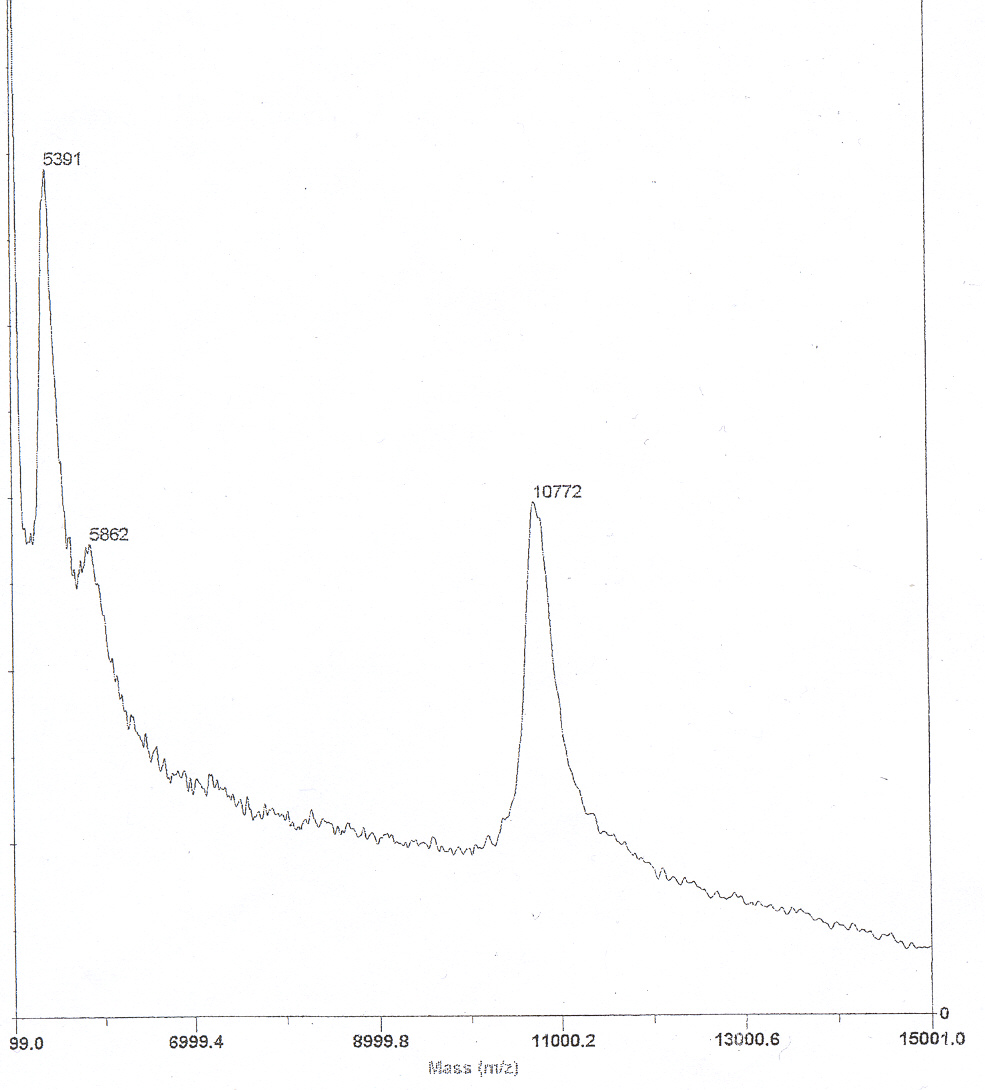


**Figure S2.** MALDI-TOF. **A,** spectrum of LOSM**-1** before aldehyde deprotection. Observed mass 10772;

calculated mass with diacetal 10676. **B**, spectrum of LOSM**-2** before aldehyde deprotection. Observed mass: 10675; calculated mass with diacetal: 10614.

**Structures of the LOM (Linear Oligonucleotide-functionalized Modules)**. Structures of the modules referred to in the article are given below in Fig. S3.

**Figure S3.** The LOMs have the following DNA sequences LOM**-4**: 5’-AAGTGTAGATGTACA -LM-ACTTCAGTTGGTCGT-3’; LOM**-2**: 5´-ACGACCAACTGAAGT-LM-CTGTAGACATATGTT-3’

**References**

S1) K. V. Gothelf, , A. Thomsen, M. Nielsen, E. Cló and R. S. Brown, *J. Am. Chem. Soc.,* 2004, **126**, 1044.
